# Supplementary material for: Rapid detection and visible light driven photocatalytic degradation of chloramphenicol in aqueous medium using a CoAl2O4/rGO nanocomposite
Source: Royal Society of Chemistry journal article supplement (doi:10.1039/d4nj05369a), 2025-01-01
Supplement: d4nj05369a1.pdf [file d4nj05369a1.pdf]

## Supplemental Information

### **Rapid detection and visible light driven photocatalytic degradation of chloramphenicol in aqueous medium using $\text{CoAl}_2\text{O}_4/\text{rGO}$ nanocomposite**

**Kamalpreet Kaur<sup>a,#</sup>, Tarab Akhtar<sup>a,#</sup>, Gagandeep Singh<sup>b,#</sup>, Navneet Kaur<sup>c,\*</sup>, Narinder Singh<sup>a,\*</sup>**

<sup>a</sup>Department of Chemistry, Indian Institute of Technology Ropar, Rupnagar, Punjab 140001, India

<sup>b</sup>Chitkara College of Pharmacy, Chitkara University, Punjab 140401, India

<sup>c</sup>Department of Chemistry, Punjab University, Chandigarh 160014, India

*# The authors contributed equally in this work*

**Corresponding author's E-mail:** nsingh@iitrpr.ac.in; navneetkaur@pu.ac.in

---

| S.No.             | Title                                                                                                                                                                                                                   |
|-------------------|-------------------------------------------------------------------------------------------------------------------------------------------------------------------------------------------------------------------------|
| <b>Figure S1</b>  | Linear calibration plot of CV showing the linear change in peak current of CoAl <sub>2</sub> O <sub>4</sub> -rGO/GCE respectively with increasing concentration of CAP.                                                 |
| <b>Figure S2</b>  | Plot of square root scan rate vs current with error bars                                                                                                                                                                |
| <b>Figure S3</b>  | Plot of scan rate vs current                                                                                                                                                                                            |
| <b>Figure S4</b>  | Linear regression plot between log current versus log of scan rate.                                                                                                                                                     |
| <b>Figure S5</b>  | Linear calibration plot of LSV showing the linear change in peak current with a concentration of CAP.                                                                                                                   |
| <b>Figure S6</b>  | Linear calibration plot of DPV showing the linear change in peak current with a concentration of CAP.                                                                                                                   |
| <b>Figure S7</b>  | Linear calibration plot of the amperometry study after successive addition of CAP.                                                                                                                                      |
| <b>Figure S8</b>  | (A) EIS measurements for various concentrations of CAP at rGO-CoAl <sub>2</sub> O <sub>4</sub> /GCE. (B) The calibration curve for the determination of CAP.                                                            |
| <b>Figure S9</b>  | Plot of pH vs. current in 0.1 M PBS containing 120 µM solution of CAP at the CoAl <sub>2</sub> O <sub>4</sub> -rGO.                                                                                                     |
| <b>Figure S10</b> | Correlation of pH with Ep.                                                                                                                                                                                              |
| <b>Figure S11</b> | Bar graph showing the stability of response of CoAl <sub>2</sub> O <sub>4</sub> -rGO for CAP detection with number of days.                                                                                             |
| <b>Figure S12</b> | Reduction peak currents of 2.5, 5, 7.5 and 10 mg CoAl <sub>2</sub> O <sub>4</sub> -rGO/GCE of 120 µM CAP in 0.1 M PBS pH 7.00 at scan rate 100 mV s <sup>-1</sup>                                                       |
| <b>Figure S13</b> | Bar graph showing the stability of response of CoAl <sub>2</sub> O <sub>4</sub> -rGO for CAP detection with number of different samples.                                                                                |
| <b>Figure S14</b> | EDAX analysis of rGO.                                                                                                                                                                                                   |
| <b>Figure S15</b> | EDAX analysis of CoAl <sub>2</sub> O <sub>4</sub> .                                                                                                                                                                     |
| <b>Figure S16</b> | EDAX analysis of rGO@CoAl <sub>2</sub> O <sub>4</sub> .                                                                                                                                                                 |
| <b>Figure S17</b> | (A) The particle size distribution histogram of CoAl <sub>2</sub> O <sub>4</sub> nanoparticles, (B) DLS histogram of CoAl <sub>2</sub> O <sub>4</sub> nanoparticles                                                     |
| <b>Figure S18</b> | (A) Absorption spectra of CAP photocatalytic degradation under the influence of various catalysts, (B) Photocatalytic degradation efficiencies of various catalysts and (C) absorption capacities of various catalysts. |
| <b>Figure S19</b> | Reactions involving degradation of CAP using rGO@CoAl <sub>2</sub> O <sub>4</sub> .                                                                                                                                     |
| <b>Figure S20</b> | Degradation products of CAP using CoAl <sub>2</sub> O <sub>4</sub> /rGO nanocomposite.                                                                                                                                  |

|                   |                                                      |
|-------------------|------------------------------------------------------|
| <b>Figure S21</b> | Schematic illustration of CAP real sample analysis.  |
| <b>Table 1</b>    | Real sample analysis of CAP in water                 |
| <b>Table 2.</b>   | Comparison with literature reports for CAP detection |

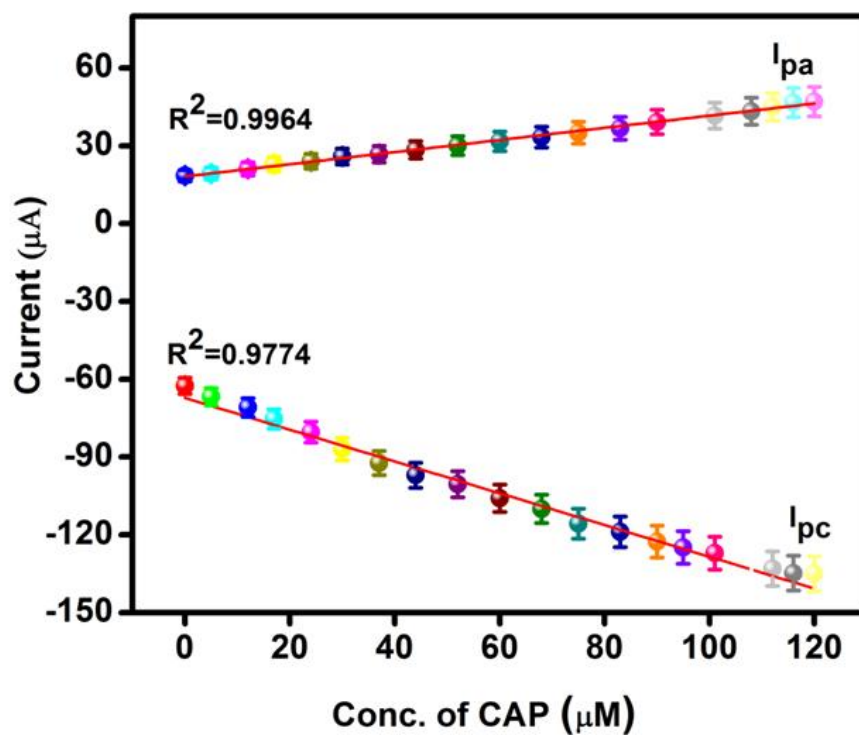

**Figure S1.** Linear calibration plot of CV showing the linear change in peak current of  $\text{CoAl}_2\text{O}_4\text{-rGO/GCE}$  respectively with increasing concentration of CAP.

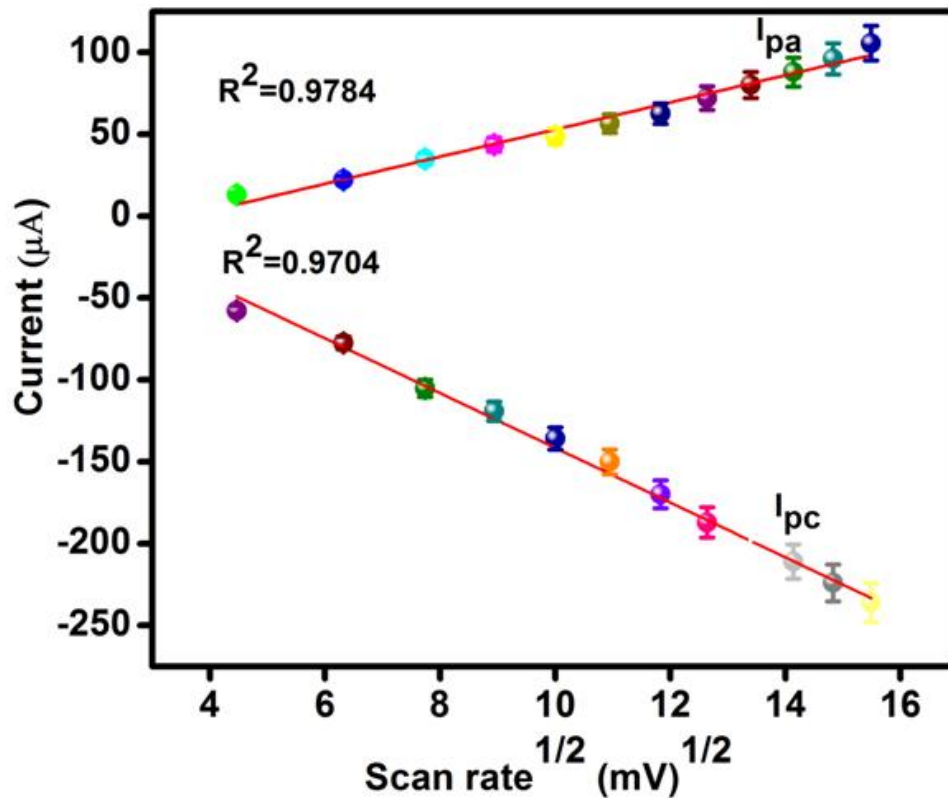

**Figure S2.** Plot of square root scan rate vs current with error bars

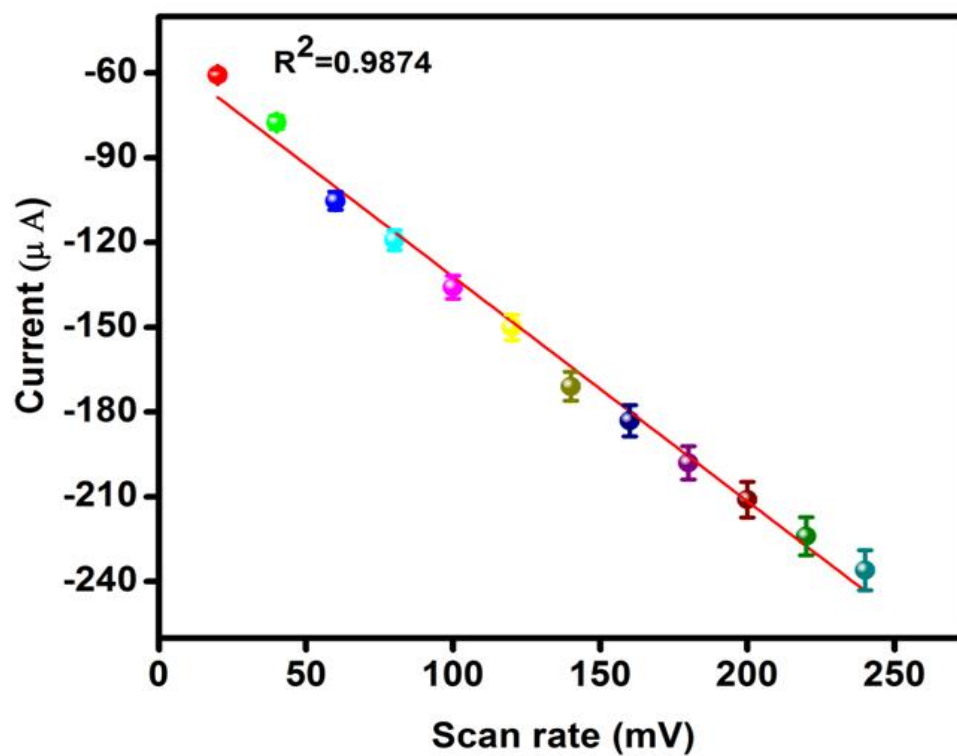

Figure S3. Plot of scan rate vs current

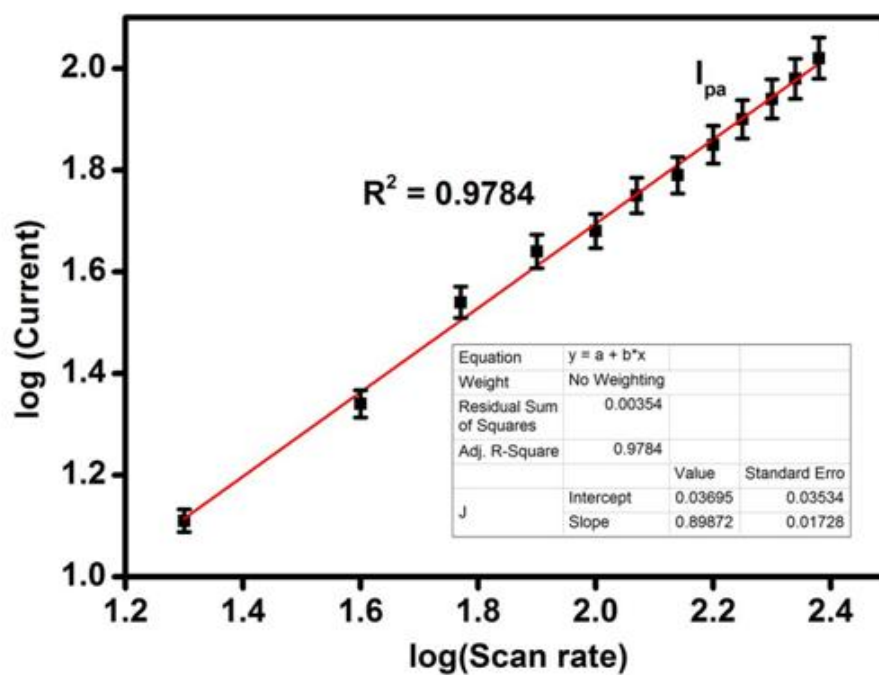

Figure S4. Linear regression plot between log current versus log of scan rate.

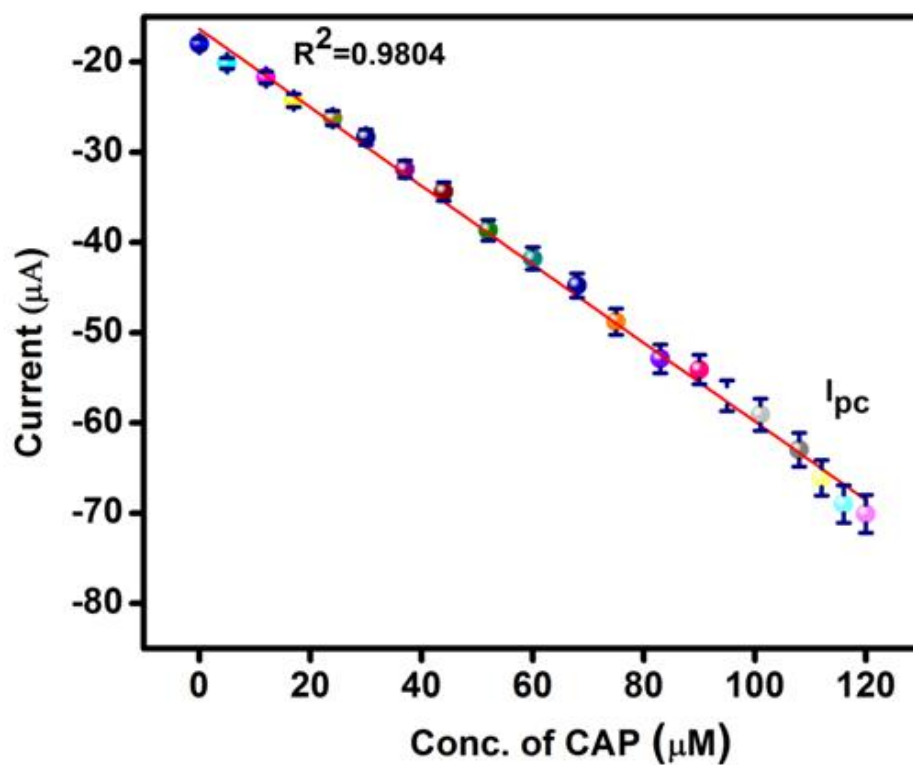

**Figure S5.** Linear calibration plot of LSV showing the linear change in peak current with a concentration of CAP.

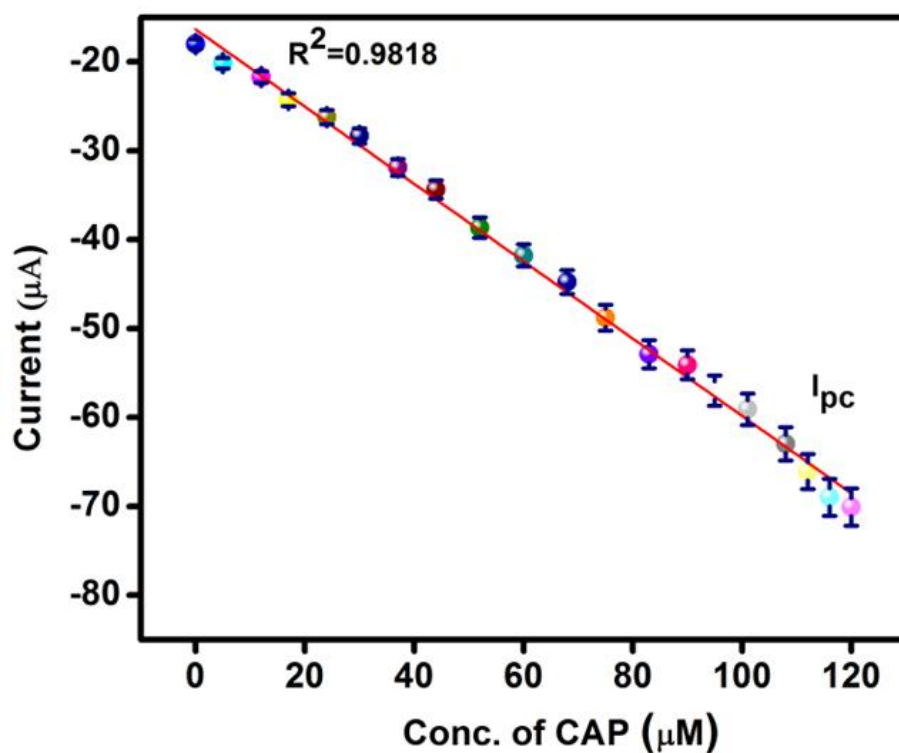

**Figure S6.** Linear calibration plot of DPV showing the linear change in peak current with a concentration of CAP.

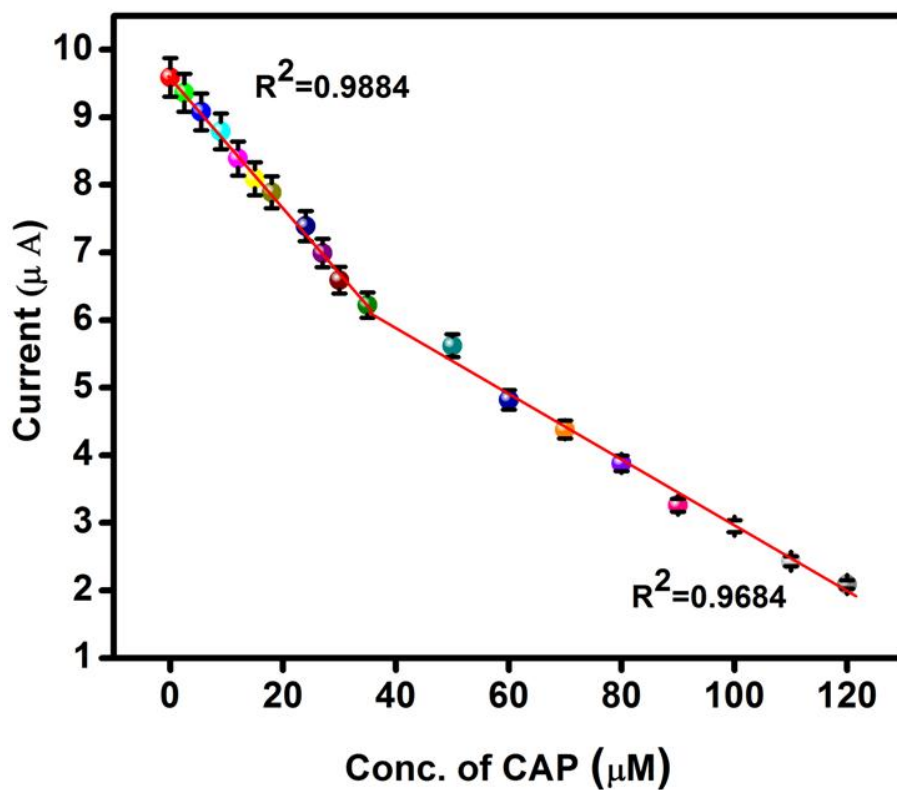

**Figure S7.** Linear calibration plot of the amperometry study after successive addition of CAP.

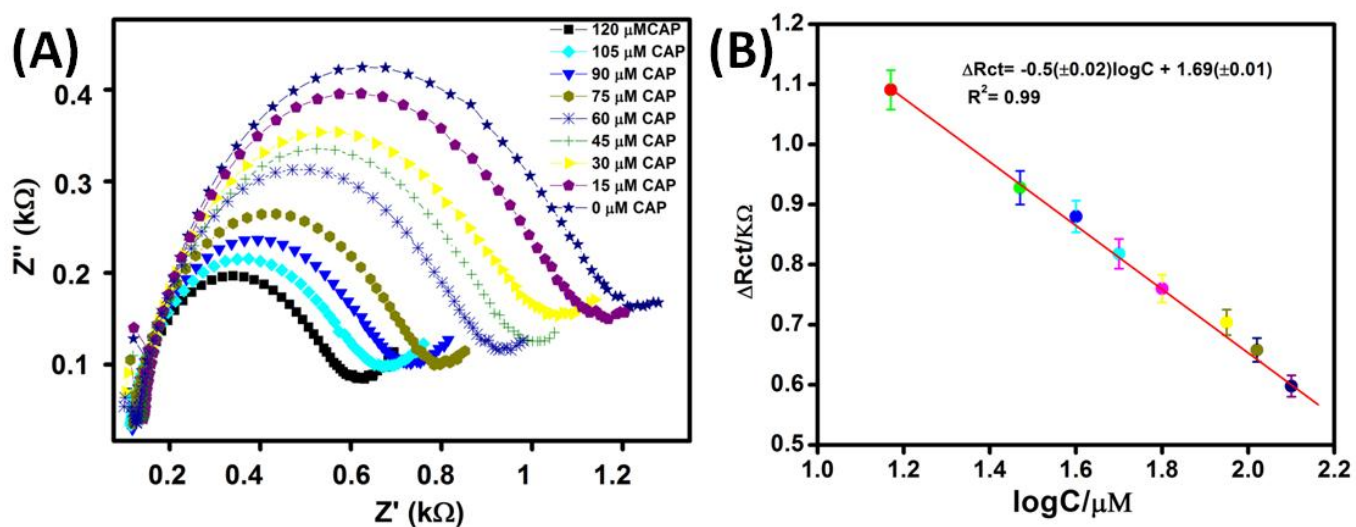

**Figure S8.** (A) EIS measurements for various concentrations of CAP at rGO-CoAl<sub>2</sub>O<sub>4</sub>/GCE. (B) The calibration curve for the determination of CAP.

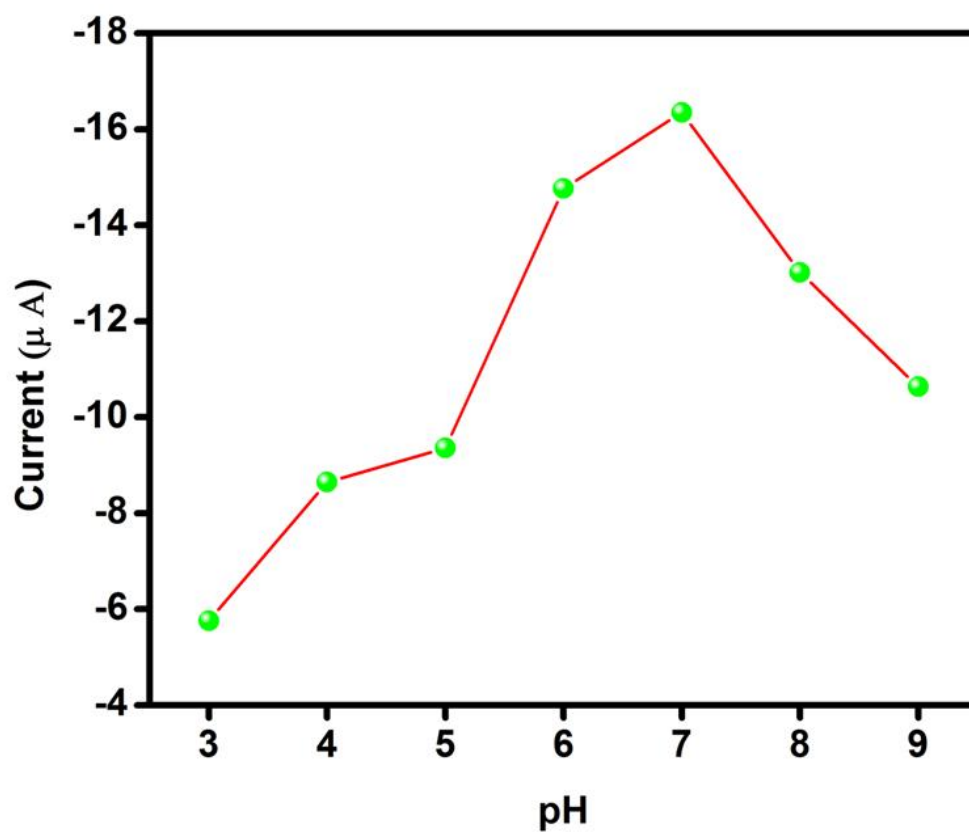

**Figure S9.** Plot of pH vs. current in 0.1 M PBS containing 120  $\mu\text{M}$  solution of CAP at the  $\text{CoAl}_2\text{O}_4\text{-rGO}$ .

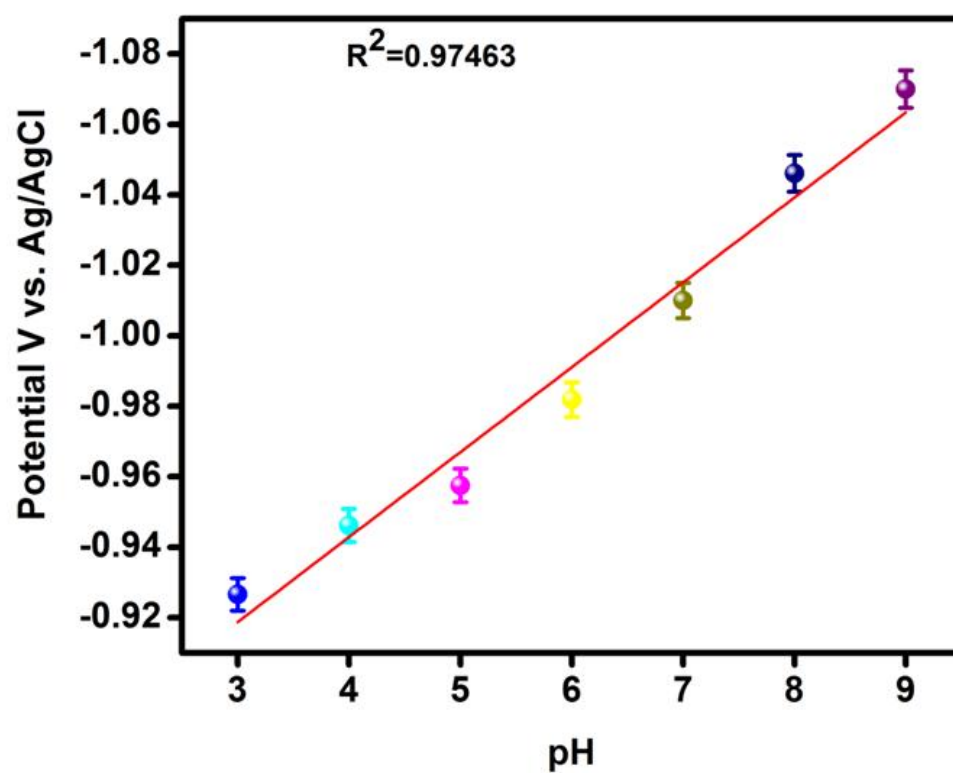

**Figure S10.** Correlation of pH with  $E_p$ .

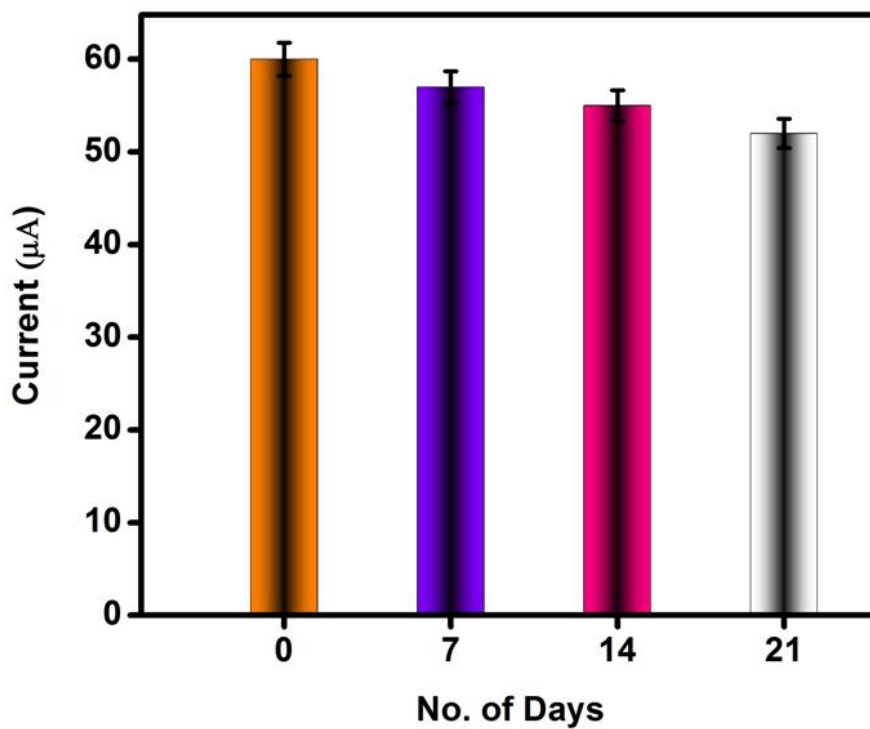

**Figure S11.** Bar graph showing the stability of response of  $\text{CoAl}_2\text{O}_4\text{-rGO}$  for CAP detection with number of days.

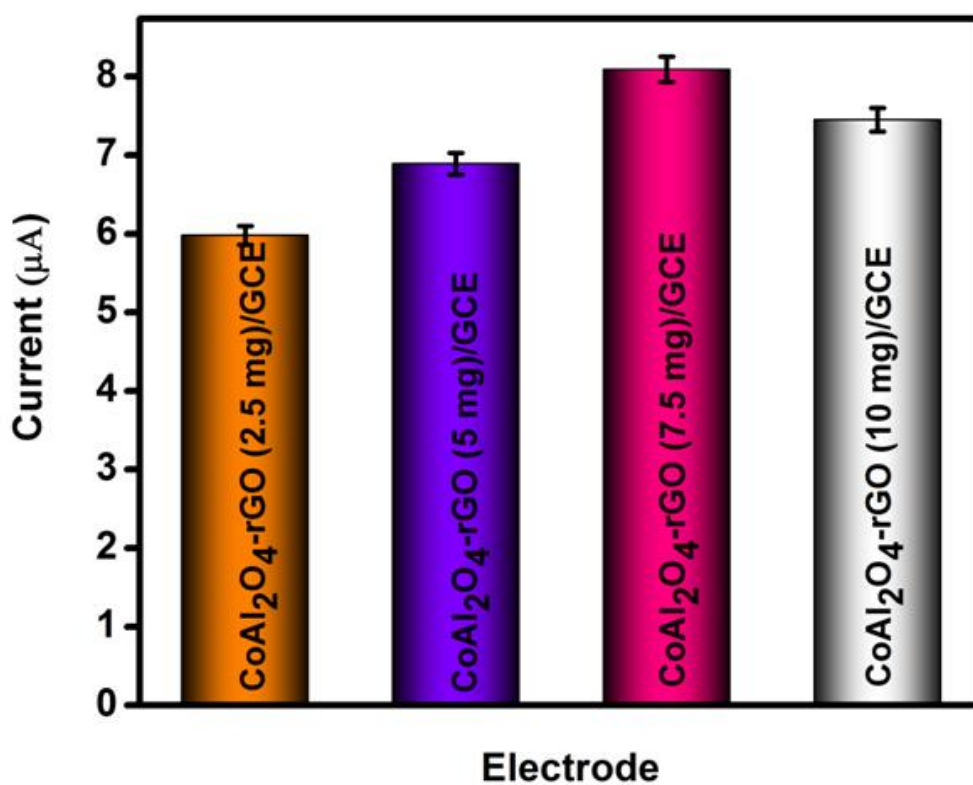

**Figure S12.** Reduction peak currents of 2.5, 5, 7.5 and 10 mg  $\text{CoAl}_2\text{O}_4\text{-rGO/GCE}$  of  $120\ \mu\text{M}$  CAP in  $0.1\ \text{M}$  PBS pH 7.00 at scan rate  $100\ \text{mV s}^{-1}$

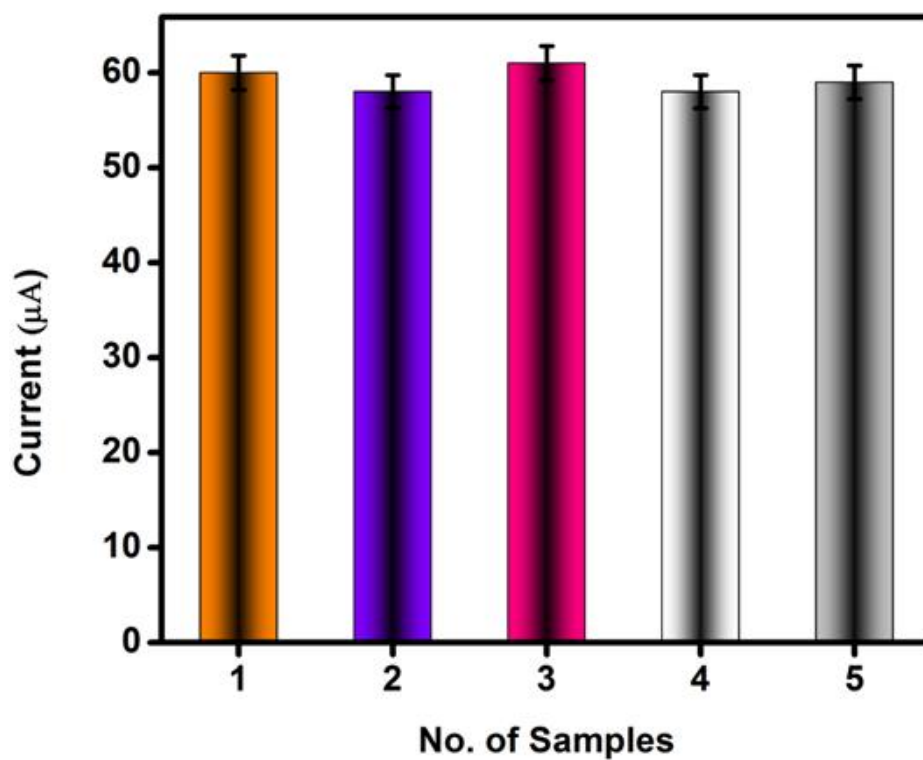

**Figure S13.** Bar graph showing the stability of response of  $\text{CoAl}_2\text{O}_4\text{-rGO}$  for CAP detection with number of different samples.

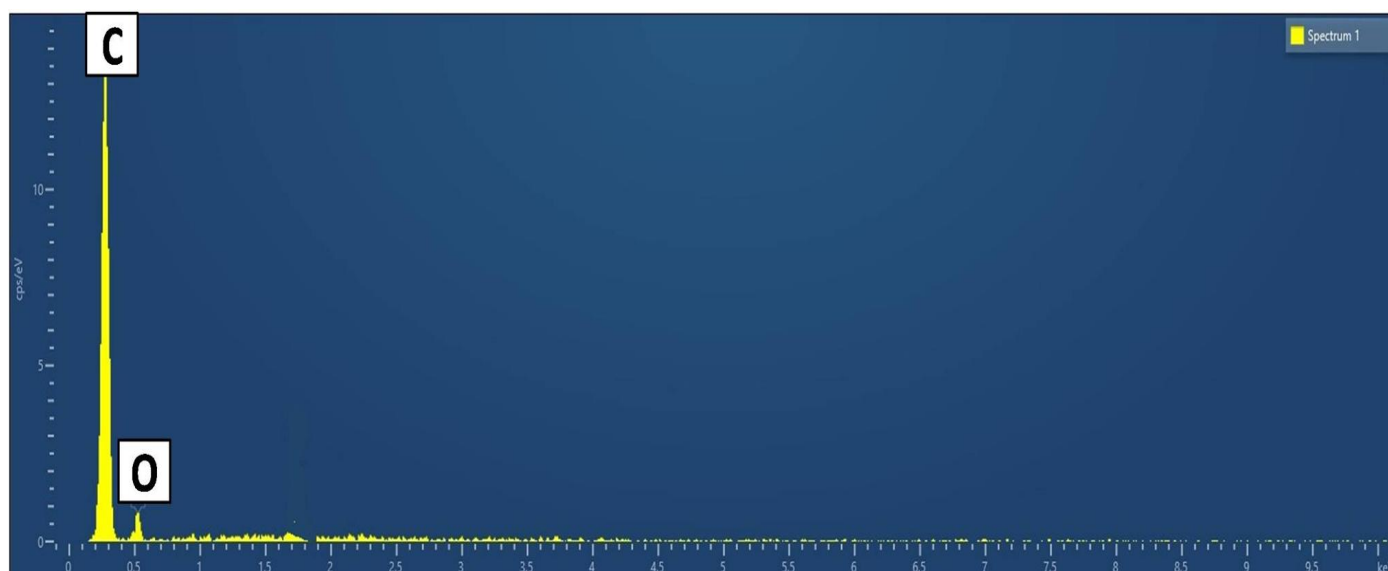

**Figure S14.** EDAX analysis of rGO.

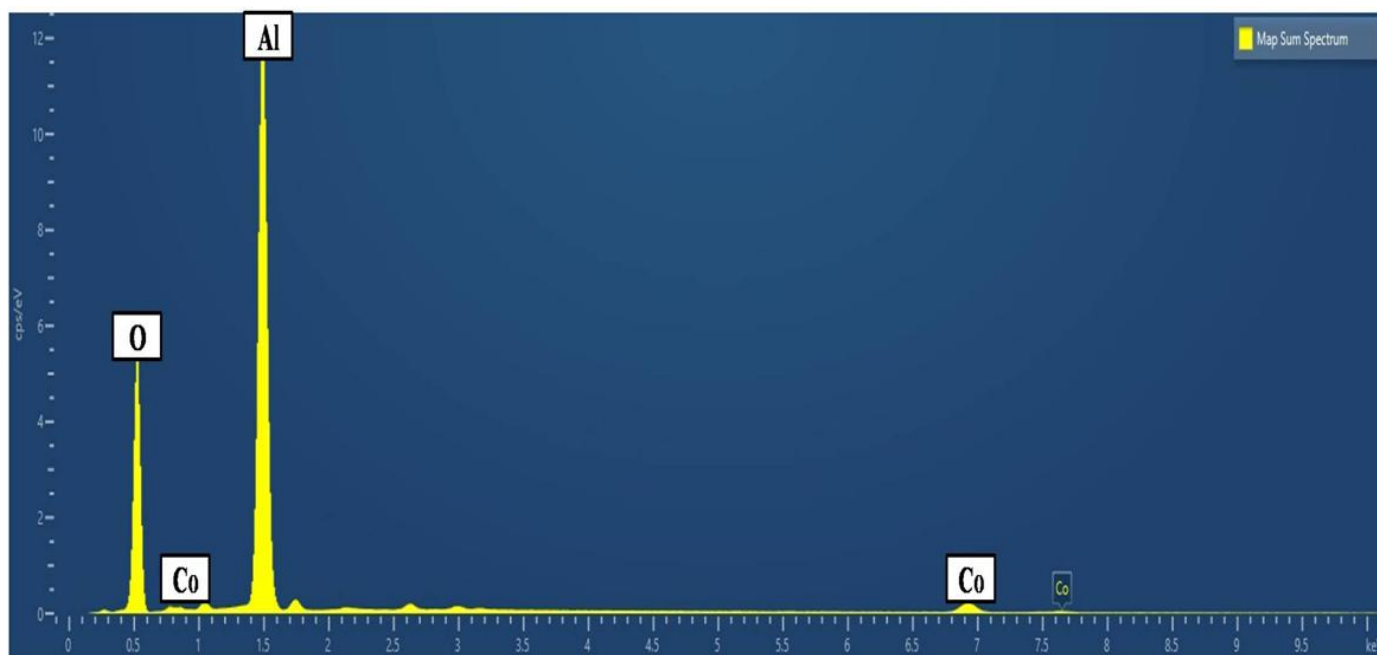

**Figure S15.** EDAX analysis of  $\text{CoAl}_2\text{O}_4$ .

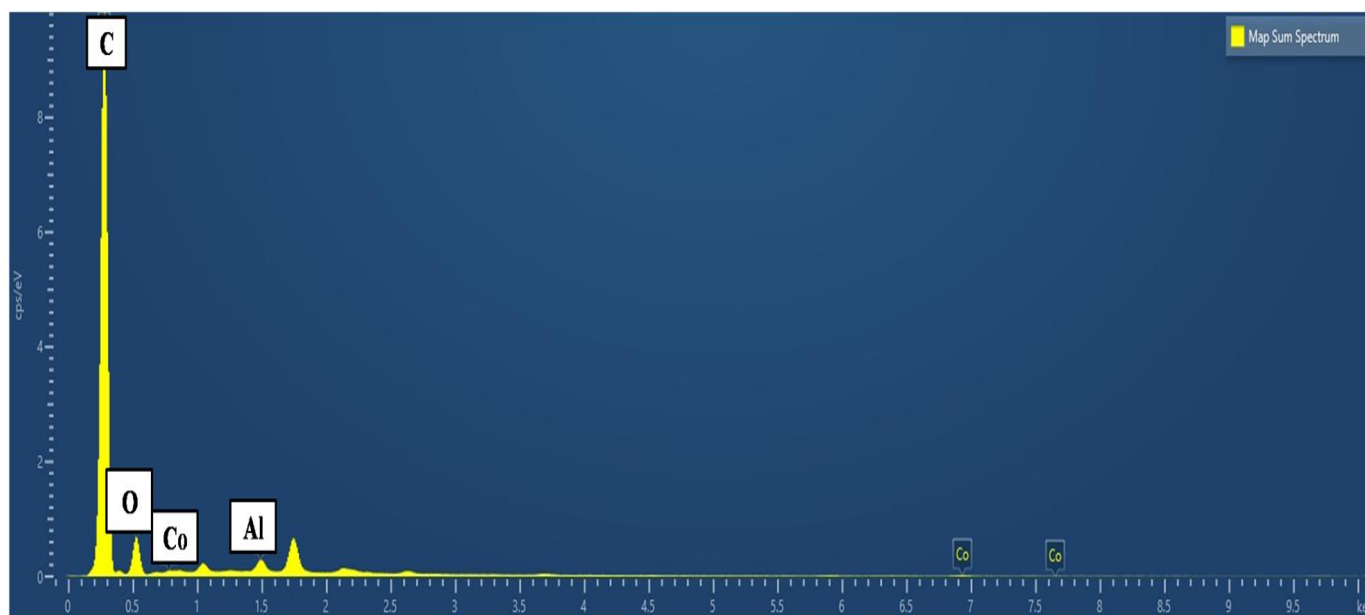

**Figure S16.** EDAX analysis of  $\text{rGO@CoAl}_2\text{O}_4$ .

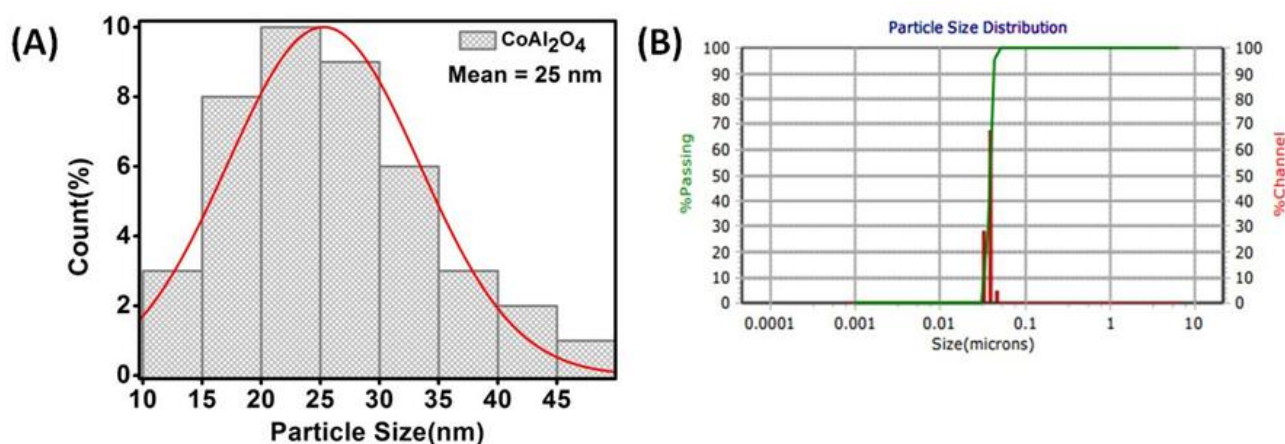

**Figure S17.** (A) The particle size distribution histogram of  $\text{CoAl}_2\text{O}_4$  nanoparticles, (B) DLS histogram of  $\text{CoAl}_2\text{O}_4$  nanoparticles

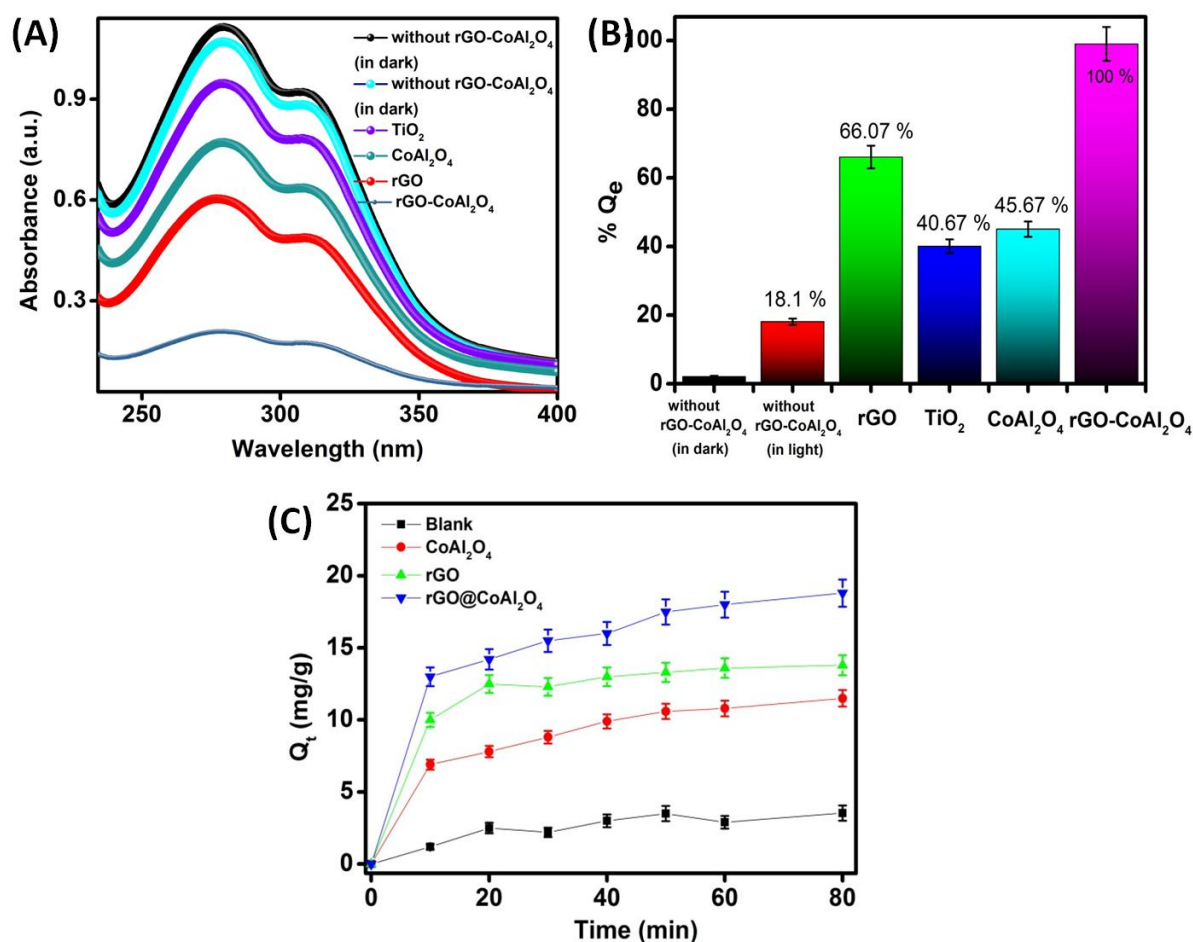

**Figure S18.** (A) Absorption spectra of CAP photocatalytic degradation under the influence of various catalysts, (B) Photocatalytic degradation efficiencies of various catalysts and (C) adsorption capacities of various catalysts.

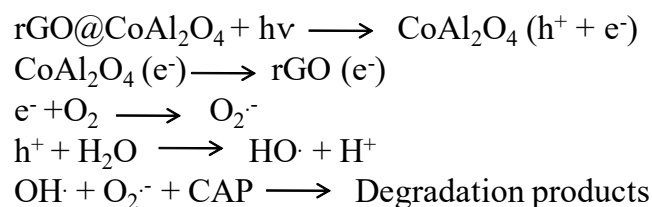

**Figure S19.** Reactions involving degradation of CAP using rGO@CoAl<sub>2</sub>O<sub>4</sub>.

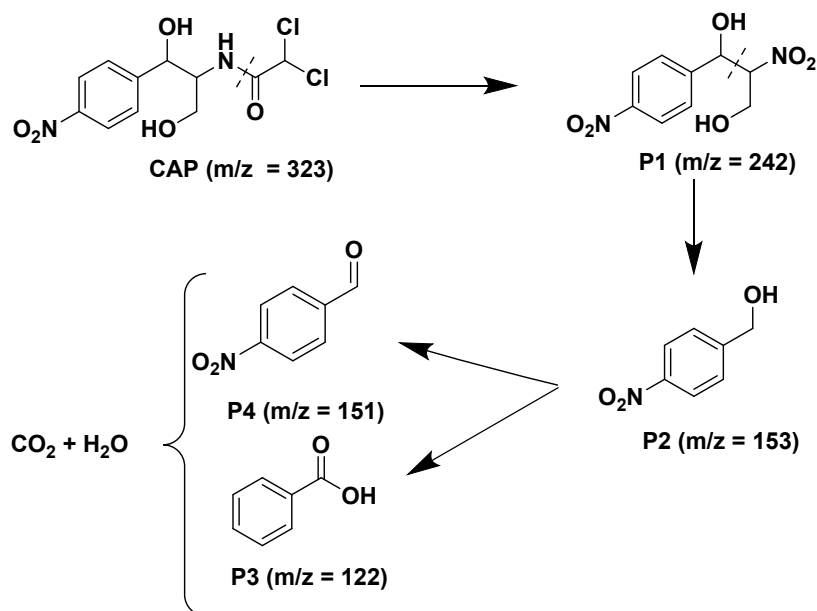

**Figure S20.** Degradation products of CAP using CoAl<sub>2</sub>O<sub>4</sub>/rGO nanocomposite.

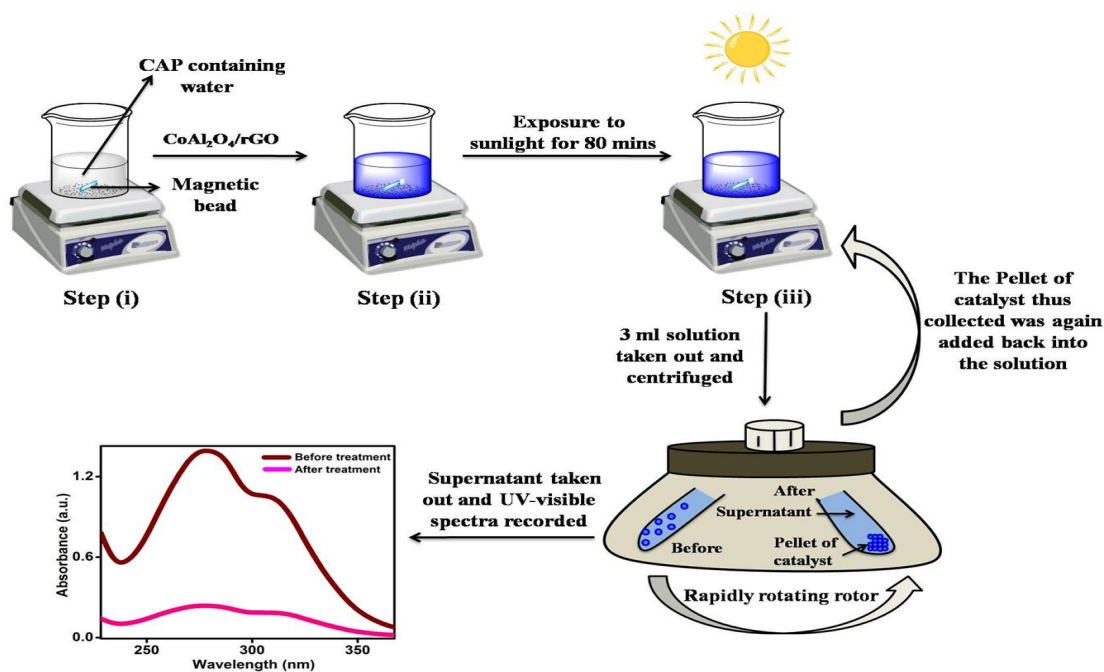

**Figure S21:** Schematic illustration of CAP real sample analysis.

## Real sample analysis of CAP in water

**Table 1.**

| Sample                              | Added/ $10^{-6}$ mol/L | Found/ $10^{-6}$ mol/L | RSD (%) | Degradation (%) |
|-------------------------------------|------------------------|------------------------|---------|-----------------|
| River water                         | 10.00                  | 9.18                   | 0.83    | 91.80           |
|                                     | 25.00                  | 24.19                  | 2.07    | 96.76           |
| Tap water                           | 10.00                  | 9.89                   | 0.75    | 98.90           |
|                                     | 50.00                  | 50.55                  | 2.08    | 101.10          |
| Pharmaceutical<br>Sewage wastewater | 10.00                  | 10.36                  | 0.43    | 103.6           |
|                                     | 25.0                   | 25.19                  | 1.05    | 100.76          |

**Table 2.**

Comparison with literature reports for CAP detection

| S.No. | Probe                                                                                               | Detection method                             | Application   | Detection Limit              | Linear range                                              | References   |
|-------|-----------------------------------------------------------------------------------------------------|----------------------------------------------|---------------|------------------------------|-----------------------------------------------------------|--------------|
| 1.    | Mn <sub>3</sub> O <sub>4</sub> nanoparticles for detection of chloramphenicol                       | Electrochemical sensor                       | Milk samples  | 0.008 $\mu$ M                | 0.007-0.013 $\mu$ M                                       | <sup>1</sup> |
| 2.    | GCE modified with CS-MWCNTs electro-polymerization for detection of chloramphenicol                 | Electrochemical sensor                       | Milk samples  | $3.3 \times 10^{-2}$ $\mu$ M | 0.1-1000 $\mu$ M                                          | <sup>2</sup> |
| 3.    | MIP/Uio-66@CDs/GCE for detection of chloramphenicol                                                 | Electrochemical Impedance Spectroscopy (EIS) | Water samples | $61 \times 10^{-9}$ $\mu$ M  | $40 \times 10^{-9}$ $\mu$ M - $61 \times 10^{-9}$ $\mu$ M | <sup>3</sup> |
| 4.    | CdS <sub>0.75</sub> Se <sub>0.25</sub> @oligo peptide quantum dots for detection of chloramphenicol | Fluorescent spectroscopy                     | Milk samples  | 0.89 $\mu$ g/L               | 3.13 to 500 $\mu$ g/L                                     | <sup>4</sup> |
| 5.    | MIP-functionalized rGO for adsorption and detection of chloramphenicol                              | Electrochemical detection                    | Honey samples | 0.204 $\mu$ M                | 0.1 $\mu$ M – 1.2 $\mu$ M                                 | <sup>5</sup> |

|    |                                                                                           |                                          |                     |                 |                                    |           |
|----|-------------------------------------------------------------------------------------------|------------------------------------------|---------------------|-----------------|------------------------------------|-----------|
| 6. | Sn/rGO/SPCE (Screen printed electrode) for detection of chloramphenicol                   | Electrochemical detection                | Milk, honey samples | 0.2 $\mu$ M     | 0.5–30 $\mu$ M                     | 6         |
| 7. | Ag nanoparticles for detection of chloramphenicol                                         | Surface-enhanced Raman scattering (SERS) | Food samples        | 10–5 $\mu$ g/mL | 102 to 10 <sup>-5</sup> $\mu$ g/mL | 7         |
| 8. | AuNPs/MoS <sub>2</sub> /TiO <sub>2</sub> for detection of Chloramphenicol                 | Photochemical aptasensor                 | Milk samples        | 0.5 pM          | 0.3-0.5 pM                         | 8         |
| 9. | CoAl <sub>2</sub> O <sub>4</sub> -rGO for removal as well as detection of chloramphenicol | Electrochemical detection                | Water samples       | 13.5 nM         | 3.4-13.5 nM                        | This work |

## References

1. R. Nehru, S. Gnanakrishnan, C.-W., Chen, C.-D, Dong, *ACS Appl. Nano Mater.*,2023, **6**, 1235–1249.
2. L. Geng, J. Huang, H. Zhai, Z. Shen, J. Han, Y. Yu, H. Fang, F. Li, X. Sun, Y. Guo, *Microchemical Journal*,2022, **182**, 107887.
3. L. Bu, X. Chen, Q. Song, D. Jiang, X. Shan, W. Wang, Z. Chen, *Microchemical Journal*,2022, **179**, 107459.
4. X. Xu, Y. Yang, H. Jin, B. Pang, R. Yang, L. Yan, C. Jiang, D. Shao, J. Shi, *ACS Sustainable Chem. Eng.*,2020, **8**, 6806–6814.
5. T. N. T. Nguyen, N. Thi Pham, D.-H. Ngo, S. Kumar, X. T. Cao, *ACS Omega*,2023, **8** , 25385–25391.
6. S. Bunnasit, K. Thamsirianunt, R. Rakthabut, K. Jeamjumnunja, C. Prasittichai, W. Siriwatcharapiboon, *ACS Appl. Nano Mater.*,2024, **7**, 267–278.
7. H. Li, W. Geng, M. M. Hassan, M. Zuo, W. Wei, X. Wu, Q. Ouyang, Q. Chen, Q. *Food Control*, 2021, **128**, 108186.
8. C. Zhao, T. Jing, M. Dong, D. Pan, J. Guo, J. Tian, M. Wu, N. Naik, M. Huang, Z. Guo, *Langmuir*, 2022, **38**, 2276–2286.
